# Supplementary material for: High-Fiber Diet and Crohn’s Disease: Systematic Review and Meta-Analysis
Source: MDPI journal article supplement (doi:10.3390/nu15143114), 2023-07-12
Supplement: s1 [file s1]

**Table S1.** JBI Critical Appraisal for Randomized Clinical Trials

|                                                                                                                                                                                      | Heaton K, et al. |    |         |    | Lacerda J, et al. |    |         |    |
|--------------------------------------------------------------------------------------------------------------------------------------------------------------------------------------|------------------|----|---------|----|-------------------|----|---------|----|
|                                                                                                                                                                                      | Yes              | No | Unclear | NA | Yes               | No | Unclear | NA |
| Was true randomization used for assignment of participants to treatment groups?                                                                                                      |                  |    | x       |    | x                 |    |         |    |
| Was allocation to treatment groups concealed?                                                                                                                                        | x                |    |         |    | x                 |    |         |    |
| Were treatment groups similar at the baseline?                                                                                                                                       |                  |    | x       |    |                   |    | x       |    |
| Were participants blind to treatment assignment?                                                                                                                                     |                  | x  |         |    | x                 |    |         |    |
| Were those delivering the treatment blind to treatment assignment?                                                                                                                   | x                |    |         |    |                   | x  |         |    |
| Were treatment groups treated identically other than the intervention of interest?                                                                                                   | x                |    |         |    | x                 |    |         |    |
| Were outcome assessors blind to treatment assignment?                                                                                                                                |                  |    | x       |    |                   | x  |         |    |
| Were outcomes measured in the same way for treatment groups?                                                                                                                         | x                |    |         |    | x                 |    |         |    |
| Were outcomes measured in a reliable way?                                                                                                                                            | x                |    |         |    | x                 |    |         |    |
| Was follow up complete and if not, were differences between groups in terms of their follow up adequately described and analysed?                                                    | x                |    |         |    | x                 |    |         |    |
| Were participants analysed in the groups to which they were randomized?                                                                                                              | x                |    |         |    | x                 |    |         |    |
| Was appropriate statistical analysis used?                                                                                                                                           | x                |    |         |    | x                 |    |         |    |
| Was the trial design appropriate and any deviations from the standard RCT design (individual randomization, parallel groups) accounted for in the conduct and analysis of the trial? |                  |    |         | x  |                   |    |         | x  |
| Overall appraisal                                                                                                                                                                    | Included         |    |         |    | Included          |    |         |    |

Abbreviations: NA, Not applicable. Maximum score: 13 points.
