# Supplementary material for: High-Fiber Diet and Crohn’s Disease: Systematic Review and Meta-Analysis
Source: MDPI journal article supplement (doi:10.3390/nu15143114), 2023-07-12
Supplement: s1 [file s1]

**Table S3.** JBI Critical Appraisal for Cohort Studies

|                                                                                                            | Schreiner P, et al. |    |         |    | Dolovich C, et al. |    |         |    | Brotherton C, et al. |    |         |    |
|------------------------------------------------------------------------------------------------------------|---------------------|----|---------|----|--------------------|----|---------|----|----------------------|----|---------|----|
|                                                                                                            | Yes                 | No | Unclear | NA | Yes                | No | Unclear | NA | Yes                  | No | Unclear | NA |
| Were the two groups similar and recruited from the same population?                                        | x                   |    |         |    | x                  |    |         |    | x                    |    |         |    |
| Were the exposures measured similarly to assign people to both exposed and unexposed groups?               | x                   |    |         |    | x                  |    |         |    | x                    |    |         |    |
| Was the exposure measured in a valid and reliable way?                                                     | x                   |    |         |    | x                  |    |         |    | x                    |    |         |    |
| Were confounding factors identified?                                                                       |                     | x  |         |    | x                  |    |         |    | x                    |    |         |    |
| Were strategies to deal with confounding factors stated?                                                   |                     | x  |         |    |                    | x  |         |    |                      | x  |         |    |
| Were the groups/participants free of the outcome at the start of the study (or at the moment of exposure)? |                     | x  |         |    |                    | x  |         |    |                      | x  |         |    |
| Were the outcomes measured in a valid and reliable way?                                                    | x                   |    |         |    | x                  |    |         |    | x                    |    |         |    |
| Was the follow up time reported and sufficient to be long enough for outcomes to occur?                    | x                   |    |         |    | x                  |    |         |    |                      |    | x       |    |
| Was follow up complete, and if not, were the reasons to loss to follow up described and explored?          | x                   |    |         |    | x                  |    |         |    | x                    |    |         |    |
| Were strategies to address incomplete follow up utilized?                                                  |                     |    |         | x  |                    |    |         | x  |                      |    |         | x  |
| Was appropriate statistical analysis used?                                                                 | x                   |    |         |    | x                  |    |         |    | x                    |    |         |    |
| Overall appraisal                                                                                          | Included            |    |         |    | Included           |    |         |    | Included             |    |         |    |

Abbreviations: NA, Not applicable. Maximum score: 11 points.
