# Supplementary material for: High-Fiber Diet and Crohn’s Disease: Systematic Review and Meta-Analysis
Source: MDPI journal article supplement (doi:10.3390/nu15143114), 2023-07-12
Supplement: s1 [file s1]

**Table S2.** JBI Critical Appraisal for Quasi-experimental Studies

|                                                                                                                                          | Chiba M, et al. [29] |    |         |    | Chiba M, et al. [30] |    |         |    | Chiba M, et al. [31] |    |         |    |
|------------------------------------------------------------------------------------------------------------------------------------------|----------------------|----|---------|----|----------------------|----|---------|----|----------------------|----|---------|----|
|                                                                                                                                          | Yes                  | No | Unclear | NA | Yes                  | No | Unclear | NA | Yes                  | No | Unclear | NA |
| Is it clear in the study what is the ‘cause’ and what is the ‘effect’ (i.e. there is no confusion about which variable comes first)?     | x                    |    |         |    | x                    |    |         |    | x                    |    |         |    |
| Were the participants included in any comparisons similar?                                                                               | x                    |    |         |    |                      | x  |         |    | x                    |    |         |    |
| Were the participants included in any comparisons receiving similar treatment/care, other than the exposure or intervention of interest? | x                    |    |         |    |                      | x  |         |    | x                    |    |         |    |
| Was there a control group?                                                                                                               |                      | x  |         |    |                      | x  |         |    |                      | x  |         |    |
| Were there multiple measurements of the outcome both pre and post the intervention/exposure?                                             | x                    |    |         |    | x                    |    |         |    | x                    |    |         |    |
| Was follow up complete and if not, were differences between groups in terms of their follow up adequately described and analyzed?        | x                    |    |         |    | x                    |    |         |    | x                    |    |         |    |
| Were the outcomes of participants included in any comparisons measured in the same way?                                                  | x                    |    |         |    | x                    |    |         |    | x                    |    |         |    |
| Were outcomes measured in a reliable way?                                                                                                | x                    |    |         |    | x                    |    |         |    | x                    |    |         |    |
| Was appropriate statistical analysis used?                                                                                               | x                    |    |         |    | x                    |    |         |    | x                    |    |         |    |
| Overall appraisal                                                                                                                        | Included             |    |         |    | Included             |    |         |    | Included             |    |         |    |

Abbreviations: NA, Not applicable. Maximum score: 9 points.
