# Supplementary material for: High-Fiber Diet and Crohn’s Disease: Systematic Review and Meta-Analysis
Source: MDPI journal article supplement (doi:10.3390/nu15143114), 2023-07-12
Supplement: s1 [file s1]

**Table S4.** JBI Critical Appraisal for Cross-sectional Studies

|                                                                          | Tasson L, et al. |    |         |    | Mirmiran P, et al. |    |         |    | Opstelten J, et al. |    |         |    |
|--------------------------------------------------------------------------|------------------|----|---------|----|--------------------|----|---------|----|---------------------|----|---------|----|
|                                                                          | Yes              | No | Unclear | NA | Yes                | No | Unclear | NA | Yes                 | No | Unclear | NA |
| Were the criteria for inclusion in the sample clearly defined?           | x                |    |         |    | x                  |    |         |    | x                   |    |         |    |
| Were the study subjects and the setting described in detail?             | x                |    |         |    | x                  |    |         |    | x                   |    |         |    |
| Was the exposure measured in a valid and reliable way?                   | x                |    |         |    | x                  |    |         |    |                     |    | x       |    |
| Were objective, standard criteria used for measurement of the condition? | x                |    |         |    | x                  |    |         |    | x                   |    |         |    |
| Were confounding factors identified?                                     | x                |    |         |    | x                  |    |         |    | x                   |    |         |    |
| Were strategies to deal with confounding factors stated?                 | x                |    |         |    |                    | x  |         |    |                     | x  |         |    |
| Were the outcomes measured in a valid and reliable way?                  | x                |    |         |    | x                  |    |         |    | x                   |    |         |    |
| Was appropriate statistical analysis used?                               | x                |    |         |    | x                  |    |         |    | x                   |    |         |    |
| Overall appraisal                                                        | Included         |    |         |    | Included           |    |         |    | Included            |    |         |    |

Abbreviations: NA, Not applicable. Maximum score: 8 points.
